# Supplementary material for: Pyridyl and pyridiniumyl β-diketones as building blocks for palladium(ii) and allyl–palladium(ii) isomers. Multinuclear NMR structural elucidation and liquid crystal behaviour
Source: Royal Society of Chemistry journal article supplement (doi:10.1039/c0nj00938e), 2011-01-01
Supplement: c0nj00938e.pdf [file c0nj00938e.pdf]

## Pyridyl and pyridiniumyl $\beta$ -diketones as building blocks for palladium(II) and allyl-palladium(II) isomers. Multinuclear NMR structural elucidation and liquid crystal behaviour

María José Mayoral,<sup>a</sup> Pilar Cornago,<sup>b</sup> Rosa M. Claramunt,<sup>b</sup> Mercedes Cano<sup>\*a</sup>

<sup>a</sup> Departamento de Química Inorgánica I, Facultad de Ciencias Químicas, Universidad Complutense de Madrid, E-28040 Madrid, Spain. Fax: 34 91394 4352; E-mail: mmcano@quim.ucm.es

<sup>b</sup> Departamento de Química Orgánica y Bio-Orgánica, Facultad de Ciencias, UNED, Senda del Rey 9, E-28040 Madrid, Spain. Fax: +34 91 3988372; E-mail: rclaramunt@ccia.uned.es

---

### ELECTRONIC SUPPLEMENTARY INFORMATION (ESI)

#### Table of Contents

##### Tables

|                                                                                                                                                                                    |   |
|------------------------------------------------------------------------------------------------------------------------------------------------------------------------------------|---|
| <b>Table S1.</b> Analytical data of the compounds [HL <sup>R(n)py</sup> ] ( <b>1-4</b> ). .....                                                                                    | 2 |
| <b>Table S2.</b> NMR data of <b>1</b> . Chemical shifts ( $\delta$ in ppm) and coupling constants ( $J$ in Hz) .....                                                               | 3 |
| <b>Table S3.</b> NMR data of <b>8</b> at 323 K. Chemical shifts ( $\delta$ in ppm) and coupling constants ( $J$ in Hz) .....                                                       | 5 |
| <b>Table S4.</b> Analytical data of the complexes [Pd( $\kappa^2$ -L <sup>R(n)py</sup> ) <sub>2</sub> ] ( <b>9-12</b> ). .....                                                     | 6 |
| <b>Table S5.</b> Analytical data of the organometallic compounds [Pd( $\eta^3$ -C <sub>3</sub> H <sub>5</sub> )(HL <sup>R(n)py</sup> )] [PF <sub>6</sub> ] ( <b>13-16</b> ). ..... | 6 |
| <b>Table S6.</b> NMR data of <b>14</b> at 323 K. Chemical shifts ( $\delta$ in ppm) and coupling constants ( $J$ in Hz) .....                                                      | 7 |
| <b>Table S7.</b> Analytical data of the organometallic compounds [Pd( $\eta^3$ -C <sub>3</sub> H <sub>5</sub> )(L <sup>R(n)pyH</sup> )] [PF <sub>6</sub> ] ( <b>17-20</b> ). ..... | 8 |
| <b>Table S8.</b> NMR data of <b>18</b> at 323 K. Chemical shifts ( $\delta$ in ppm) and coupling constants ( $J$ in Hz) .....                                                      | 9 |

##### Figures

|                                                                                                                                                                                 |    |
|---------------------------------------------------------------------------------------------------------------------------------------------------------------------------------|----|
| <b>Fig. S1</b> IR spectrum of the complex [Pd( $\kappa^2$ -L <sup>R(12)py</sup> ) <sub>2</sub> ] ( <b>9</b> ). .....                                                            | 10 |
| <b>Fig. S2</b> IR spectrum of the complex [Pd( $\eta^3$ -C <sub>3</sub> H <sub>5</sub> )(L <sup>R(14)pyH</sup> )] [PF <sub>6</sub> ] ( <b>18</b> ). .....                       | 10 |
| <b>Fig. S3</b> X-Ray diffraction pattern of [Pd( $\eta^3$ -C <sub>3</sub> H <sub>5</sub> )(HL <sup>R(16)py</sup> )] [PF <sub>6</sub> ] ( <b>15</b> ) at 160 °C on heating ..... | 11 |

**Table S1.** Analytical data of the compounds [HL<sup>R(n)py</sup>] (**1-4**).

| COMPOUND<br>n | MOLECULAR<br>FORMULA | YIELD (%)                                       | MOLECULAR<br>WEIGHT<br>(g mol <sup>-1</sup> ) | ELEMENTAL ANALYSIS |      |     |           |      |     |     |
|---------------|----------------------|-------------------------------------------------|-----------------------------------------------|--------------------|------|-----|-----------|------|-----|-----|
|               |                      |                                                 |                                               | REQUIRES (%)       |      |     | FOUND (%) |      |     |     |
|               |                      |                                                 |                                               | C                  | H    | N   | C         | H    | N   |     |
| 12            | <b>1</b>             | C <sub>26</sub> H <sub>35</sub> NO <sub>3</sub> | 68                                            | 409.6              | 76.2 | 8.6 | 3.4       | 75.9 | 8.6 | 3.5 |
| 14            | <b>2</b>             | C <sub>28</sub> H <sub>39</sub> NO <sub>3</sub> | 66                                            | 437.6              | 76.8 | 9.0 | 3.2       | 76.4 | 8.9 | 3.3 |
| 16            | <b>3</b>             | C <sub>30</sub> H <sub>43</sub> NO <sub>3</sub> | 65                                            | 465.7              | 77.4 | 9.3 | 3.0       | 77.0 | 9.3 | 2.9 |
| 18            | <b>4</b>             | C <sub>32</sub> H <sub>47</sub> NO <sub>3</sub> | 65                                            | 493.7              | 77.9 | 9.6 | 2.8       | 77.4 | 9.5 | 2.8 |

**Table S2.** NMR data of **1**. Chemical shifts ( $\delta$  in ppm) and coupling constants ( $J$  in Hz)

| <b>Atom</b>  | <b><sup>1</sup>H</b>                                                      | <b><sup>1</sup>H</b>    | <b><sup>13</sup>C</b>                                                        | <b><sup>13</sup>C</b>                                 | <b><sup>13</sup>C</b> | <b><sup>15</sup>N</b>   | <b><sup>15</sup>N</b>   | <b><sup>15</sup>N</b> |
|--------------|---------------------------------------------------------------------------|-------------------------|------------------------------------------------------------------------------|-------------------------------------------------------|-----------------------|-------------------------|-------------------------|-----------------------|
| <b>Ratio</b> | <b>Enol, 94%</b>                                                          | <b>Keto, 6%</b>         | <b>Enol</b>                                                                  | <b>Keto</b>                                           |                       | <b>Enol</b>             | <b>Keto</b>             |                       |
| <b>Phase</b> | <b>CDCl<sub>3</sub></b>                                                   | <b>CDCl<sub>3</sub></b> | <b>CDCl<sub>3</sub></b>                                                      | <b>CDCl<sub>3</sub></b>                               | <b>CPMAS</b>          | <b>CDCl<sub>3</sub></b> | <b>CDCl<sub>3</sub></b> | <b>CPMAS</b>          |
| <b>Conc.</b> | <b>0.05 M</b>                                                             | <b>0.05 M</b>           | <b>0.19 M</b>                                                                | <b>0.19 M</b>                                         |                       | <b>0.19 M</b>           | <b>0.19 M</b>           |                       |
| <b>7</b>     |                                                                           |                         | 181.2                                                                        | 196.8                                                 | 180.7                 |                         |                         |                       |
| <b>8</b>     | 7.52                                                                      | 4.8                     | 92.9                                                                         | 48.0<br><sup>1</sup> J= 129.3                         | 91.1                  |                         |                         |                       |
| <b>9</b>     |                                                                           |                         | 187.1                                                                        | 193.6                                                 | 187.0                 |                         |                         |                       |
| <b>OH</b>    | 16.64                                                                     |                         |                                                                              |                                                       |                       |                         |                         |                       |
| <b>2</b>     |                                                                           |                         | 152.6<br><sup>3</sup> J= <sup>3</sup> J= 8.6                                 | 152.7                                                 | 151.2                 |                         |                         |                       |
| <b>3</b>     | 8.15<br><sup>3</sup> J= 7.8                                               | 8.17                    | 122.0<br><sup>1</sup> J= 166.4<br><sup>3</sup> J= 6.4                        | 122.1                                                 | 118.5                 |                         |                         |                       |
| <b>4</b>     | 7.87<br><sup>3</sup> J= <sup>3</sup> J= 7.7<br><sup>4</sup> J= 1.7        | 7.89                    | 137.1<br><sup>1</sup> J= 163.4<br><sup>3</sup> J= 6.1                        | 137.0<br><sup>1</sup> J= 163.7<br><sup>3</sup> J= 6.8 | 135.4                 |                         |                         |                       |
| <b>5</b>     | 7.43<br><sup>3</sup> J= 7.5<br><sup>3</sup> J= 4.8<br><sup>4</sup> J= 1.1 | 7.47                    | 126.1<br><sup>1</sup> J= 164.3<br><sup>3</sup> J= <sup>2</sup> J= 7.5        | 126.1                                                 | 122.7                 |                         |                         |                       |
| <b>6</b>     | 8.71<br><sup>3</sup> J= 4.8<br><sup>4</sup> J= 1.7<br><sup>5</sup> J= 0.8 | 8.62                    | 149.1<br><sup>1</sup> J= 179.6<br><sup>3</sup> J= 6.8<br><sup>4</sup> J= 2.8 | 149.0<br><sup>1</sup> J= 179.6                        | 151.2                 |                         |                         |                       |
| <b>o</b>     | 8.06                                                                      | 7.96                    | 129.7<br><sup>1</sup> J= 160.3<br><sup>3</sup> J= 7.0                        | 130.9<br><sup>1</sup> J= 160.7<br><sup>3</sup> J= 7.0 | 129.8                 |                         |                         |                       |
| <b>m</b>     | 6.96                                                                      | 6.93                    | 114.4<br><sup>1</sup> J= 161.0<br><sup>3</sup> J= 4.5                        | 114.3<br><sup>1</sup> J= 161.1<br><sup>3</sup> J= 4.5 | 112.4                 |                         |                         |                       |
| <b>p</b>     |                                                                           |                         | 163.1                                                                        | 163.4                                                 | 163.6                 |                         |                         |                       |

|             |                        |       |       |
|-------------|------------------------|-------|-------|
|             | ${}^3J = {}^3J = 10.3$ |       |       |
|             | ${}^3J = {}^3J = 7.8$  |       |       |
|             | 127.8                  | 127.3 | 126.2 |
| <i>ipso</i> | ${}^3J = {}^3J = 7.4$  |       | 127.3 |

**Table S2 (Continue).** NMR data of **1**. Chemical shifts ( $\delta$  in ppm) and coupling constants ( $J$  in Hz)

| Atom              | ${}^1\text{H}$        | ${}^1\text{H}$  | ${}^{13}\text{C}$ | ${}^{13}\text{C}$ | ${}^{13}\text{C}$ | ${}^{15}\text{N}$         | ${}^{15}\text{N}$ | ${}^{15}\text{N}$ |
|-------------------|-----------------------|-----------------|-------------------|-------------------|-------------------|---------------------------|-------------------|-------------------|
| Ratio             | Enol, 94%             | Keto, 6%        | Enol              | Keto              |                   | Enol                      | Keto              |                   |
| Phase             | $\text{CDCl}_3$       | $\text{CDCl}_3$ | $\text{CDCl}_3$   | $\text{CDCl}_3$   | CPMAS             | $\text{CDCl}_3$           | $\text{CDCl}_3$   | CPMAS             |
| Conc.             | 0.05 M                | 0.05 M          | 0.19 M            | 0.19 M            |                   | 0.19 M                    | 0.19 M            |                   |
|                   |                       |                 |                   |                   |                   | -73.5                     |                   |                   |
| N1                |                       |                 |                   |                   |                   | ${}^2J(\text{H6}) = 13.1$ | -66.3             | -68.3             |
|                   |                       |                 |                   |                   |                   | ${}^3J(\text{H3}) = 8.1$  |                   |                   |
|                   |                       |                 |                   |                   |                   | ${}^3J(\text{H5}) = 9.9$  |                   |                   |
| $\text{CH}_3$     | 0.88                  |                 | 14.1              |                   | 15.0              |                           |                   |                   |
|                   | ${}^3J = {}^3J = 6.9$ |                 | ${}^1J = 124.4$   |                   |                   |                           |                   |                   |
| $(\text{CH}_2)_x$ | 1.27-1.81             |                 | 22.7-31.9         |                   | 24.6-33.8         |                           |                   |                   |
| $\text{OCH}_2$    | 4.03                  |                 | 68.3              |                   | 69.1              |                           |                   |                   |
|                   | ${}^3J = {}^3J = 6.6$ |                 | ${}^1J = 143.2$   |                   |                   |                           |                   |                   |

**Table S3.** NMR data of **8** at 323 K. Chemical shifts ( $\delta$  in ppm) and coupling constants ( $J$  in Hz)

| <b>Atom</b>                         | <b><sup>1</sup>H</b>                        | <b><sup>1</sup>H</b>    | <b><sup>13</sup>C</b>   | <b><sup>13</sup>C</b>   | <b><sup>13</sup>C</b>                        | <b><sup>15</sup>N</b> |
|-------------------------------------|---------------------------------------------|-------------------------|-------------------------|-------------------------|----------------------------------------------|-----------------------|
| <b>Ratio</b>                        | <b>Enol, 93%</b>                            | <b>Keto, 7%</b>         | <b>Enol</b>             | <b>Keto</b>             |                                              |                       |
| <b>Phase</b>                        | <b>CDCl<sub>3</sub></b>                     | <b>CDCl<sub>3</sub></b> | <b>CDCl<sub>3</sub></b> | <b>CDCl<sub>3</sub></b> | <b>CPMAS</b>                                 | <b>CPMAS</b>          |
| <b>Conc.</b>                        | <b>0.033 M</b>                              | <b>0.033 M</b>          | <b>0.033 M</b>          | <b>0.033 M</b>          |                                              |                       |
| <b>7</b>                            |                                             |                         | 174.1                   |                         | 170.5 <sup>[a]</sup>                         |                       |
| <b>8</b>                            | 8.11                                        | 4.82                    | 96.0                    |                         | 94.8 <sup>[a]</sup>                          |                       |
| <b>9</b>                            |                                             |                         | 189.9                   |                         | 188.6 <sup>[a]</sup>                         |                       |
| <b>OH</b>                           | 16.48                                       |                         |                         |                         |                                              |                       |
| <b>2</b>                            |                                             |                         | 149.9                   |                         | 142.6 <sup>[a]</sup><br>144.4 <sup>[a]</sup> |                       |
| <b>3</b>                            | 8.39<br><sup>3</sup> J=7.9                  |                         | 123.8                   |                         | 118.2 <sup>[a]</sup>                         |                       |
| <b>4</b>                            | 8.25<br><sup>3</sup> J= <sup>3</sup> J= 7.6 | 7.96                    | 141.7                   |                         | 134.1 <sup>[a]</sup>                         |                       |
| <b>5</b>                            | 7.59<br><sup>3</sup> J= <sup>3</sup> J= 6.3 | 6.92                    | 126.8                   |                         | 127.1 <sup>[a]</sup>                         |                       |
| <b>6</b>                            | 8.89<br><sup>3</sup> J= 4.9                 | 8.64                    | 145.6                   |                         | 150.1 <sup>[a]</sup><br>153.0 <sup>[a]</sup> |                       |
| <b>o</b>                            | 8.26                                        | 7.91                    | 130.8                   |                         | 130.0 <sup>[a]</sup><br>130.6 <sup>[b]</sup> |                       |
| <b>m</b>                            | 7.00                                        | 6.91                    | 114.8                   | 114.3                   | 113.5 <sup>[a]</sup>                         |                       |
| <b>p</b>                            |                                             |                         | 164.0                   |                         | 165.6 <sup>[a]</sup>                         |                       |
| <b>ipso</b>                         |                                             |                         | 127.6                   |                         | 124.2 <sup>[a]</sup>                         |                       |
| <b>N1</b>                           |                                             |                         |                         |                         |                                              | -181.6                |
| <b>CH<sub>3</sub></b>               | 0.87<br><sup>3</sup> J= <sup>3</sup> J= 6.8 |                         | 14.0                    |                         | 16.4 <sup>[a]</sup><br>14.6 <sup>[b]</sup>   |                       |
| <b>(CH<sub>2</sub>)<sub>x</sub></b> | 1.22-1.82                                   |                         | 22.7-32.2               |                         | 24.8-35.5                                    |                       |
| <b>OCH<sub>2</sub></b>              | 4.06                                        | 4.01                    | 68.5                    | 71.3                    | 69.1 <sup>[a]</sup>                          |                       |

${}^3J = {}^3J = 6.6$

$68.0^{[b]}$

**Table S4.** Analytical data of the complexes  $[\text{Pd}(\kappa^2\text{-L}^{\text{R}^{(n)\text{py}}})_2]$  (**9-12**).

| COMPOUND<br>n | MOLECULAR<br>FORMULA | YIELD<br>(%)                                              | MOLECULAR<br>WEIGHT<br>( $\text{g mol}^{-1}$ ) | ELEMENTAL ANALYSIS |      |     |           |      |     |     |
|---------------|----------------------|-----------------------------------------------------------|------------------------------------------------|--------------------|------|-----|-----------|------|-----|-----|
|               |                      |                                                           |                                                | REQUIRES (%)       |      |     | FOUND (%) |      |     |     |
|               |                      |                                                           |                                                | C                  | H    | N   | C         | H    | N   |     |
| 12            | <b>9</b>             | $\text{C}_{52}\text{H}_{68}\text{N}_2\text{O}_6\text{Pd}$ | 70                                             | 923.5              | 67.6 | 7.4 | 3.0       | 67.4 | 7.3 | 3.1 |
| 14            | <b>10</b>            | $\text{C}_{56}\text{H}_{76}\text{N}_2\text{O}_6\text{Pd}$ | 68                                             | 979.6              | 68.7 | 7.8 | 2.9       | 68.2 | 7.6 | 2.9 |
| 16            | <b>11</b>            | $\text{C}_{60}\text{H}_{84}\text{N}_2\text{O}_6\text{Pd}$ | 72                                             | 1035.7             | 69.6 | 8.2 | 2.7       | 69.6 | 8.2 | 2.5 |
| 18            | <b>12</b>            | $\text{C}_{64}\text{H}_{92}\text{N}_2\text{O}_6\text{Pd}$ | 70                                             | 1091.9             | 70.4 | 8.5 | 2.6       | 70.0 | 8.3 | 2.6 |

**Table S5.** Analytical data of the organometallic compounds  $[\text{Pd}(\eta^3\text{-C}_3\text{H}_5)(\text{HL}^{\text{R}^{(n)\text{py}}})][\text{PF}_6]$  (**13-16**).

| COMPOUND<br>n | MOLECULAR<br>FORMULA | YIELD (%)                                            | MOLECULAR<br>WEIGHT<br>( $\text{g mol}^{-1}$ ) | ELEMENTAL ANALYSIS |      |     |           |      |     |     |
|---------------|----------------------|------------------------------------------------------|------------------------------------------------|--------------------|------|-----|-----------|------|-----|-----|
|               |                      |                                                      |                                                | REQUIRED (%)       |      |     | FOUND (%) |      |     |     |
|               |                      |                                                      |                                                | C                  | H    | N   | C         | H    | N   |     |
| 12            | <b>13</b>            | $\text{C}_{29}\text{H}_{39}\text{NO}_3\text{PdPF}_6$ | 65                                             | 701.0              | 49.7 | 5.6 | 2.0       | 49.5 | 5.4 | 2.0 |
| 14            | <b>14</b>            | $\text{C}_{31}\text{H}_{43}\text{NO}_3\text{PdPF}_6$ | 66                                             | 729.1              | 51.1 | 6.0 | 1.9       | 51.5 | 5.9 | 2.1 |
| 16            | <b>15</b>            | $\text{C}_{33}\text{H}_{47}\text{NO}_3\text{PdPF}_6$ | 60                                             | 757.1              | 52.4 | 6.3 | 1.9       | 52.5 | 6.2 | 2.1 |
| 18            | <b>16</b>            | $\text{C}_{35}\text{H}_{51}\text{NO}_3\text{PdPF}_6$ | 60                                             | 785.2              | 53.5 | 6.6 | 1.8       | 53.7 | 6.8 | 1.8 |

**Table S6.** NMR data of **14** at 323 K. Chemical shifts ( $\delta$  in ppm) and coupling constants ( $J$  in Hz)

| <b>Atom</b>          | <b><sup>1</sup>H</b>                        | <b><sup>13</sup>C</b>          | <b><sup>13</sup>C</b> | <b><sup>15</sup>N</b> |
|----------------------|---------------------------------------------|--------------------------------|-----------------------|-----------------------|
| <b>Phase</b>         | <b>CDCl<sub>3</sub></b>                     | <b>CDCl<sub>3</sub></b>        | <b>CPMAS</b>          | <b>CPMAS</b>          |
| <b>Concentration</b> | <b>0.042 M</b>                              | <b>0.042 M</b>                 |                       |                       |
| <b>7</b>             |                                             | 185.3                          | 189.8                 |                       |
| <b>8</b>             | 7.23                                        | 94.1<br><sup>1</sup> J= 167.2  | 92.1                  |                       |
| <b>9</b>             |                                             | 185.3                          | 180.7                 |                       |
| <b>OH</b>            | 14.80                                       |                                |                       |                       |
| <b>2</b>             |                                             | 152.8                          | 149.6                 |                       |
| <b>3</b>             | 8.58<br><sup>3</sup> J= 7.9                 | 126.6<br><sup>1</sup> J= 173.6 | 127.1                 |                       |
| <b>4</b>             | 8.11                                        | 141.3                          | 139.0                 |                       |
| <b>5</b>             | 7.64<br><sup>3</sup> J= <sup>3</sup> J= 5.8 | 129.7                          | 131.7                 |                       |
| <b>6</b>             | 8.70<br><sup>3</sup> J= 4.2                 | 151.9                          | 151.6                 |                       |
| <b>o</b>             | 8.16                                        | 131.6                          | 131.7                 |                       |
| <b>m</b>             | 7.01                                        | 115.5<br><sup>1</sup> J= 162.7 | 119.7                 |                       |
| <b>p</b>             |                                             | 165.8                          | 163.0                 |                       |

|                                                |                                     |           |               |
|------------------------------------------------|-------------------------------------|-----------|---------------|
| <i>ipso</i>                                    |                                     | 123.7     | 122.0         |
| <b>CH<sub>2</sub>-allyl (H<sub>s</sub>)</b>    | 4.38                                | 61.0      | 66.6 / 68.3   |
|                                                | <sup>s</sup> J= 6.5                 |           |               |
| <b>CH<sub>2</sub>-allyl (H<sub>a</sub>)</b>    | 3.39                                | 61.0      | 66.6 / 68.3   |
|                                                | <sup>a</sup> J= 12.2                |           |               |
| <b>CH<sub>2</sub>-allyl (H<sub>meso</sub>)</b> | 5.80                                | 115.8     | 113.1 / 116.3 |
|                                                | <sup>s</sup> J= 6.5                 |           |               |
|                                                | <sup>a</sup> J= 12.2                |           |               |
| <b>N1</b>                                      |                                     |           | -130.0        |
| <b>CH<sub>3</sub></b>                          | 0.89                                | 14.0      | 15.2          |
|                                                | <sup>3</sup> J= <sup>3</sup> J= 6.9 |           |               |
| <b>CH<sub>2</sub></b>                          | 1.29-1.85                           | 22.7-31.9 | 25.6-34.6     |
| <b>OCH<sub>2</sub></b>                         | 4.07                                | 68.9      | 56.1          |
|                                                | <sup>3</sup> J= <sup>3</sup> J= 6.5 |           |               |

**Table S7.** Analytical data of the organometallic compounds [Pd(η<sup>3</sup>-C<sub>3</sub>H<sub>5</sub>)(L<sup>R(n)pyH</sup>)] [PF<sub>6</sub>] (**17-20**).

| COMPOUND<br><b>n</b> | MOLECULAR<br>FORMULA | YIELD (%)                                                         | MOLECULAR<br>WEIGHT<br>(g mol <sup>-1</sup> ) | ELEMENTAL ANALYSIS |      |     |           |      |     |     |
|----------------------|----------------------|-------------------------------------------------------------------|-----------------------------------------------|--------------------|------|-----|-----------|------|-----|-----|
|                      |                      |                                                                   |                                               | REQUIRED (%)       |      |     | FOUND (%) |      |     |     |
|                      |                      |                                                                   |                                               | C                  | H    | N   | C         | H    | N   |     |
| 12                   | <b>17</b>            | C <sub>29</sub> H <sub>39</sub> NO <sub>3</sub> PdPF <sub>6</sub> | 65                                            | 701.0              | 49.7 | 5.6 | 2.0       | 49.6 | 5.5 | 2.0 |
| 14                   | <b>18</b>            | C <sub>31</sub> H <sub>43</sub> NO <sub>3</sub> PdPF <sub>6</sub> | 68                                            | 729.1              | 51.1 | 6.0 | 1.9       | 51.0 | 5.9 | 2.0 |
| 16                   | <b>19</b>            | C <sub>33</sub> H <sub>47</sub> NO <sub>3</sub> PdPF <sub>6</sub> | 70                                            | 757.1              | 52.4 | 6.3 | 1.9       | 52.4 | 6.3 | 2.1 |
| 18                   | <b>20</b>            | C <sub>35</sub> H <sub>51</sub> NO <sub>3</sub> PdPF <sub>6</sub> | 70                                            | 785.2              | 53.5 | 6.6 | 1.8       | 53.7 | 6.6 | 1.9 |



**Table S8.** NMR data of **18** at 323 K. Chemical shifts ( $\delta$  in ppm) and coupling constants ( $J$  in Hz)

| <b>Atom</b>          | <b><sup>1</sup>H</b>                              | <b><sup>13</sup>C</b>             | <b><sup>15</sup>N</b> |
|----------------------|---------------------------------------------------|-----------------------------------|-----------------------|
| <b>Phase</b>         | <b>CDCl<sub>3</sub></b>                           | <b>CDCl<sub>3</sub></b>           | <b>CPMAS</b>          |
| <b>Concentration</b> | <b>0.042 M</b>                                    | <b>0.042 M</b>                    |                       |
| <b>7</b>             |                                                   | 185.4                             |                       |
| <b>8</b>             | 7.53                                              | 94.6<br><sup>1</sup> $J$ = 167.2  |                       |
| <b>9</b>             |                                                   | 185.4                             |                       |
| <b>NH</b>            | 14.60                                             |                                   |                       |
| <b>2</b>             |                                                   | 152.7                             |                       |
| <b>3</b>             | 8.52<br><sup>3</sup> $J$ = 7.9                    | 126.0<br><sup>1</sup> $J$ = 173.6 |                       |
| <b>4</b>             | 8.16                                              | 140.7                             |                       |
| <b>5</b>             | 7.67<br><sup>3</sup> $J$ = <sup>3</sup> $J$ = 5.8 | 128.9                             |                       |
| <b>6</b>             | 8.78<br><sup>3</sup> $J$ = 4.2                    | 152.2                             |                       |

|                                                |                 |           |              |
|------------------------------------------------|-----------------|-----------|--------------|
| <i>o</i>                                       | 8.20            | 131.3     |              |
| <i>m</i>                                       | 7.02            | 115.2     | $^1J= 162.7$ |
| <i>p</i>                                       |                 | 165.2     |              |
| <i>ipso</i>                                    |                 | 124.2     |              |
| <b>CH<sub>2</sub>-allyl (H<sub>s</sub>)</b>    | 4.23            | 61.0      |              |
|                                                | $^sJ= 6.5$      |           |              |
| <b>CH<sub>2</sub>-allyl (H<sub>a</sub>)</b>    | 3.19            | 61.0      |              |
|                                                | $^aJ= 12.2$     |           |              |
| <b>CH<sub>2</sub>-allyl (H<sub>meso</sub>)</b> | 5.68            | 115.2     |              |
|                                                | $^sJ= 6.5$      |           |              |
|                                                | $^aJ= 12.2$     |           |              |
| <b>N1</b>                                      |                 |           | -185.6       |
| <b>CH<sub>3</sub></b>                          | 0.88            | 14.1      |              |
|                                                | $^3J= ^3J= 6.9$ |           |              |
| <b>(CH<sub>2</sub>)<sub>x</sub></b>            | 1.29-1.85       | 22.7-31.9 |              |
| <b>OCH<sub>2</sub></b>                         | 4.08            | 68.7      |              |
|                                                | $^3J= ^3J= 6.5$ |           |              |

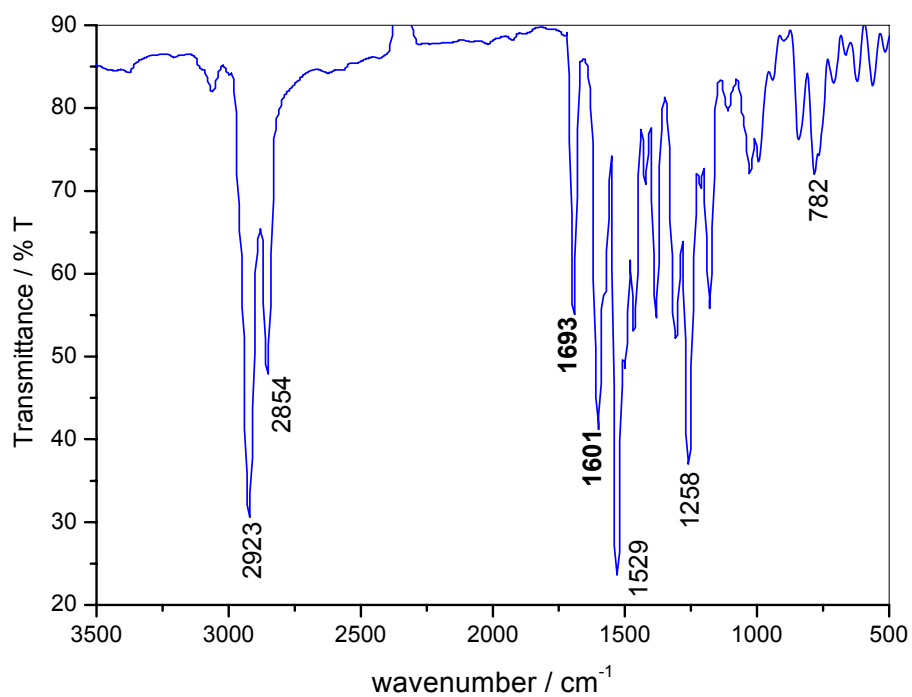

**Fig. S1** IR spectrum of the complex  $[\text{Pd}(\kappa^2\text{-L}^{\text{R}(12)\text{py}})_2]$  (**9**).

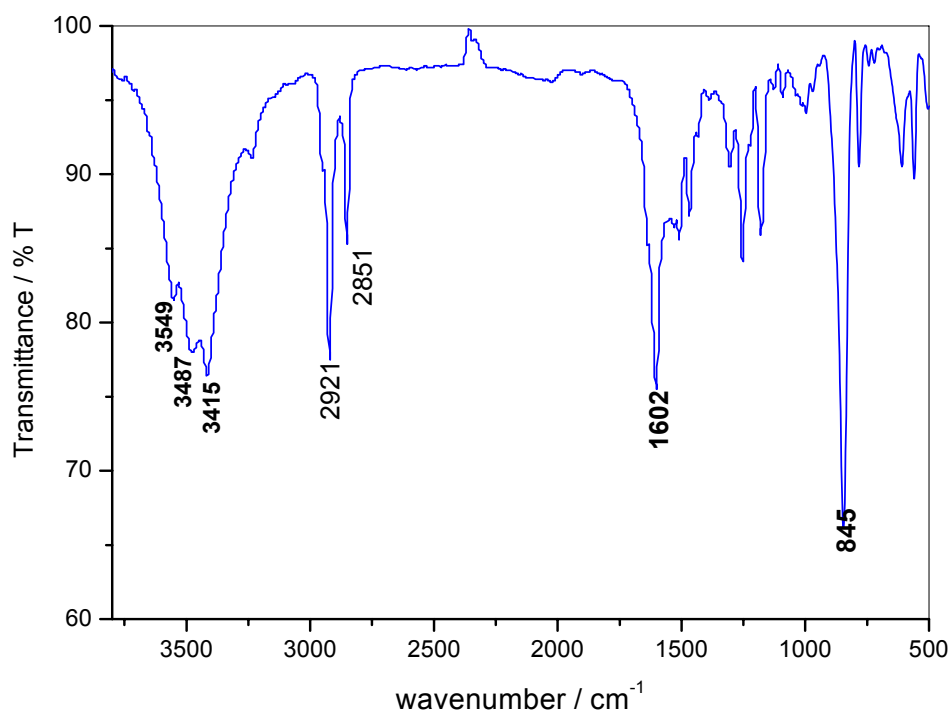

**Fig. S2** IR spectrum of the complex  $[\text{Pd}(\eta^3\text{-C}_3\text{H}_5)(\text{L}^{\text{R}(14)\text{pyH}})][\text{PF}_6]$  (**18**).

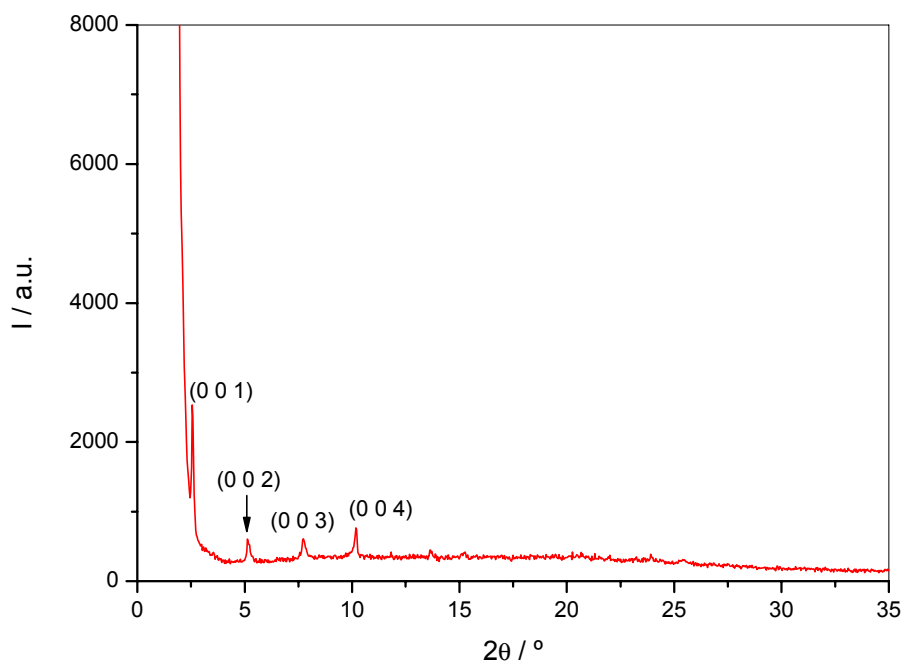

**Fig. S3** X-Ray diffraction pattern of  $[\text{Pd}(\eta^3\text{-C}_3\text{H}_5)(\text{HL}^{\text{R}(16)\text{py}})][\text{PF}_6]$  (**15**) at 160 °C on heating
